# Supplementary material for: Towards Whole Health Toxicology: In-Silico Prediction of Diseases Sensitive to Multi-Chemical Exposures
Source: Preprints.org preprint supplement (doi:10.20944/preprints202210.0082.v1), 2022-10-07

**Figure S1.** SOM neighbor distant plot of non-neoplastic diseases based on the similarity of their overlap with chemically sensitive KEGG pathways.


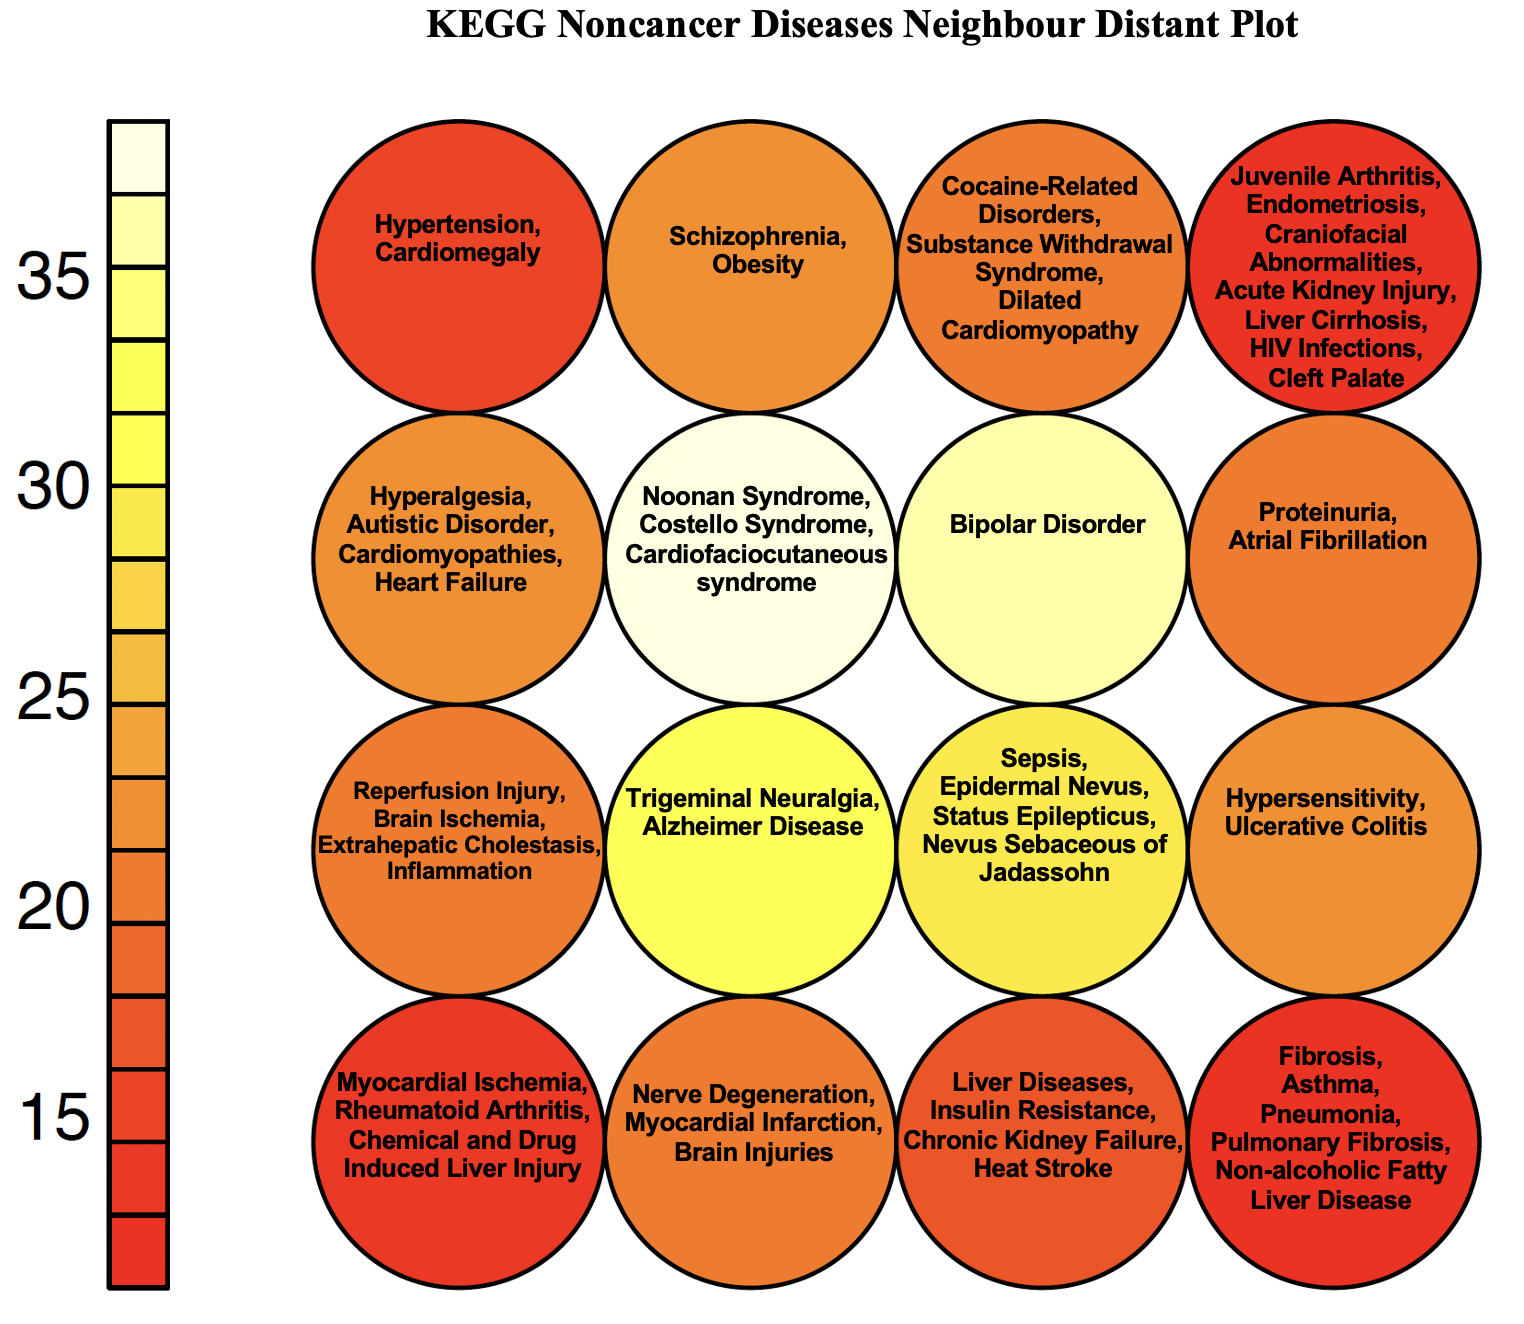


**Figure S2.** Hierarchical clustering of non-neoplastic diseases based on the similarity of their overlap with chemically sensitive KEGG pathways.


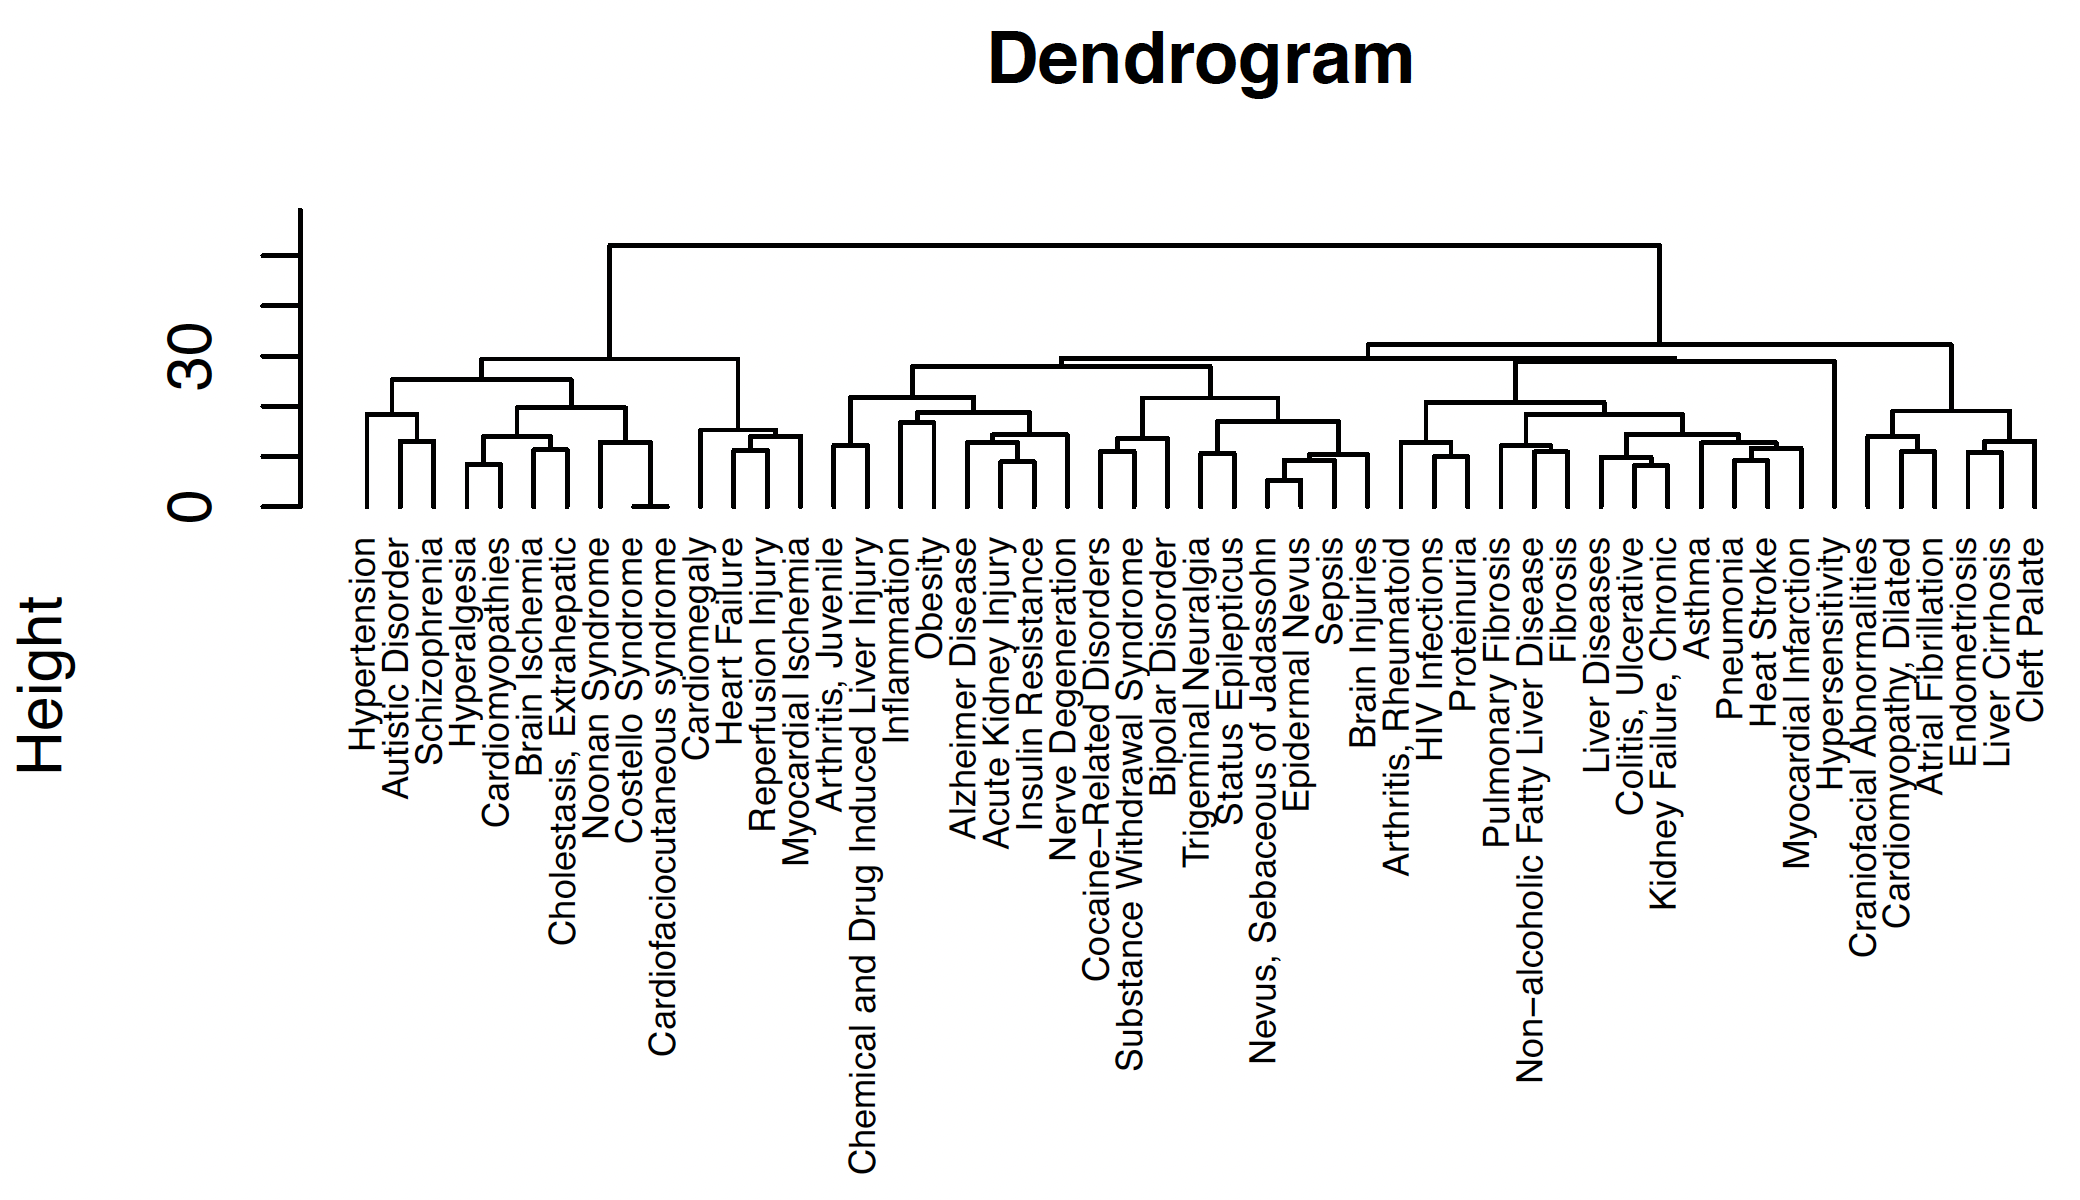

Supplement: Supplementary file 1 [file Supplimental File_AS.docx]
